# Supplementary material for: Uniaxial thermal expansion behaviors and ionic conduction in a layered (NH4)2V3O8
Source: Royal Society of Chemistry journal article supplement (doi:10.1039/d0dt01833c), 2020-01-01
Supplement: d0dt01833c1.pdf [file d0dt01833c1.pdf]

## **Uniaxial thermal expansion behaviors and ionic conduction in a layered $(\text{NH}_4)_2\text{V}_3\text{O}_8$**

Zhi-Yuan Yao,<sup>a</sup> Guo-Qin Zhang,<sup>a</sup> Wan-Wan Yao,<sup>a</sup> Xiao-Zu Wang,<sup>\*b</sup> Yin Qian,<sup>a</sup>  
Xiao-Ming Ren<sup>\*a,c,d</sup>

<sup>a</sup> State Key Laboratory of Materials-Oriented Chemical Engineering and College of Chemistry and Molecular Engineering, Nanjing Tech University, Nanjing 211816, P. R. China

<sup>b</sup> College of Chemical Engineering, Nanjing Tech University, Nanjing 211816, P. R. China

<sup>c</sup> College of Materials Science and Engineering, Nanjing Tech University, Nanjing 211816, P. R. China

<sup>d</sup> State Key Laboratory of Coordination Chemistry, Nanjing University, Nanjing 210023, P. R. China

Email: [wangxiaoze@njtech.edu.cn](mailto:wangxiaoze@njtech.edu.cn) (XZW)

[xmren@njtech.edu.cn](mailto:xmren@njtech.edu.cn) (XMR)

## Contents

Fig. S1: SEM images with different magnifications for the lamellar crystals of  $(\text{NH}_4)_2\text{V}_3\text{O}_8$ .

Fig. S2: (a) PXRD patterns of  $(\text{NH}_4)_2\text{V}_3\text{O}_8$  at ambient temperature (b) TG and its derivative region of  $(\text{NH}_4)_2\text{V}_3\text{O}_8$  in 303-1073 K

Fig. S3: DSC plots of  $(\text{NH}_4)_2\text{V}_3\text{O}_8$  in 173-473 K

Fig. S4: Plots of relative cell parameters of  $\Delta V/V$  against temperature in the range of 110-300 K for  $(\text{NH}_4)_2\text{V}_3\text{O}_8$

Fig. S5: Plots of lattice parameters ( $a$  and  $c$ ) as a function of temperature in the form of natural logarithm for  $(\text{NH}_4)_2\text{V}_3\text{O}_8$ . Herein, the linear fitting is performed for  $a$  in the temperature ranges of 110-220 K and 240-300 K; for  $c$  in the temperature ranges of 110-170 K, 170-220 K and 240-300 K, respectively. The coefficient of thermal expansion of lattice is given by

$$\alpha_L = \frac{1}{L} \left( \frac{\partial L}{\partial T} \right)_p$$

In which  $L$  represents the lattice parameters  $a$ - and  $c$ -axes. In the plot of  $\ln L$  vs.  $T$ , the

slope  $\frac{1}{L} \left( \frac{\partial L}{\partial T} \right)_p$  corresponds to the lattice coefficient of thermal expansion.

Fig. S6: Impedance plots of  $(\text{NH}_4)_2\text{V}_3\text{O}_8$  at selected temperature from 123-203 K

Fig. S7: Experimental and fitted impedance spectra of  $(\text{NH}_4)_2\text{V}_3\text{O}_8$  at the selected temperatures (Inset: the equivalent circuit)

Table S1: Selected bond lengths and bond valence sum (BVS) for calculation of  $V$  at 110, 190 and 300 K

Table S2: Crystallographic data and structural refinements for  $(\text{NH}_4)_2\text{V}_3\text{O}_8$  at the selected temperatures

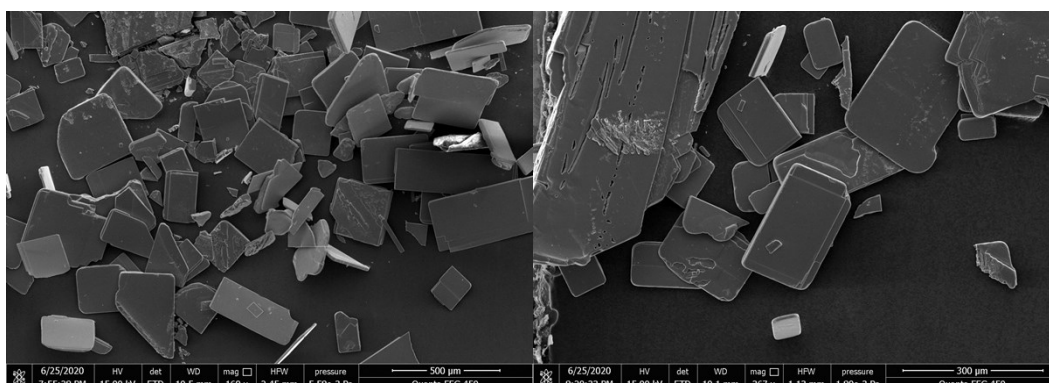

Fig. S1: SEM images with different magnifications for the lamellar crystals of  $(\text{NH}_4)_2\text{V}_3\text{O}_8$ .

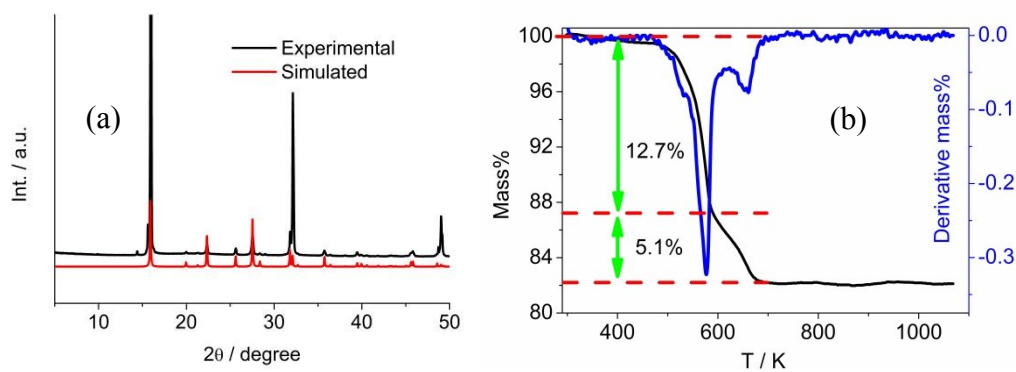

Fig. S2: (a) PXRD patterns of  $(\text{NH}_4)_2\text{V}_3\text{O}_8$  at ambient temperature (b) TG and its derivative region of  $(\text{NH}_4)_2\text{V}_3\text{O}_8$  in 303-1073 K.

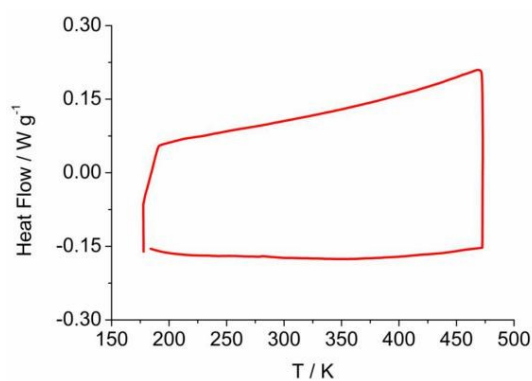

Fig. S3: DSC plots of  $(\text{NH}_4)_2\text{V}_3\text{O}_8$  in 173-473 K.

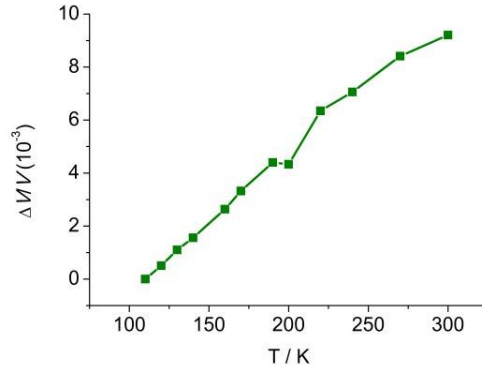

Fig. S4: Plots of relative cell parameters of  $\Delta V/V$  against temperature in the range of 110-300 K for  $(\text{NH}_4)_2\text{V}_3\text{O}_8$ .

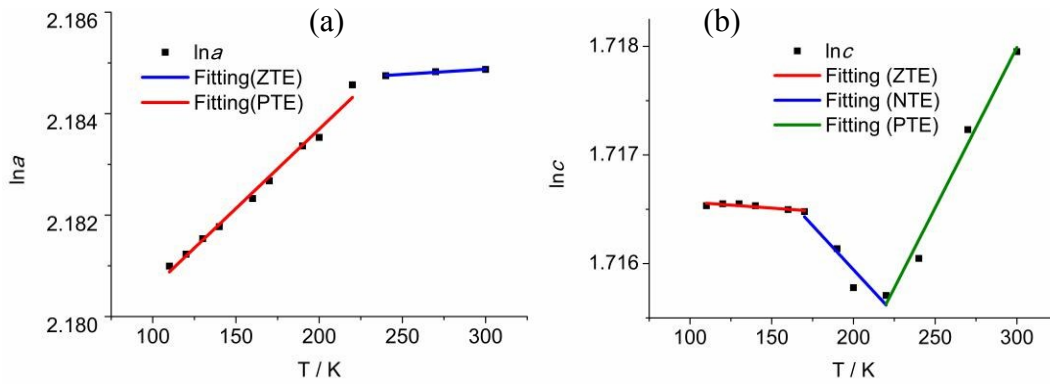

Fig. S5: Plots of lattice parameters ( $a$  and  $c$ ) as a function of temperature in the form of natural logarithm for  $(\text{NH}_4)_2\text{V}_3\text{O}_8$ . Herein, the linear fitting is performed for  $a$  in the temperature ranges of 110-220 K and 240-300 K; for  $c$  in the temperature ranges of 110-170 K, 170-220 K and 240-300 K, respectively. The coefficient of thermal expansion of lattice is given by

$$\alpha_L = \frac{1}{L} \left( \frac{\partial L}{\partial T} \right)_p$$

In which  $L$  represents the lattice parameters  $a$ - and  $c$ -axes. In the plot of  $\ln L$  vs.  $T$ , the

slope  $\frac{1}{L} \left( \frac{\partial L}{\partial T} \right)_p$  corresponds to the lattice coefficient of thermal expansion.

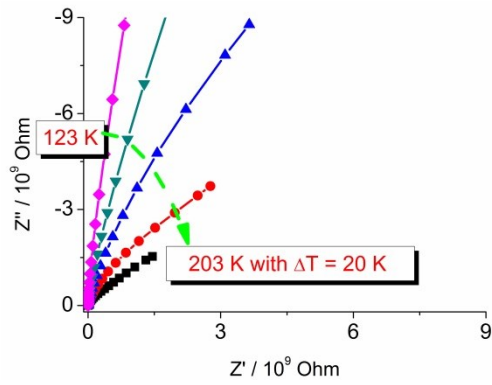

Fig. S6: Impedance plots of  $(\text{NH}_4)_2\text{V}_3\text{O}_8$  at selected temperature from 123-203 K.

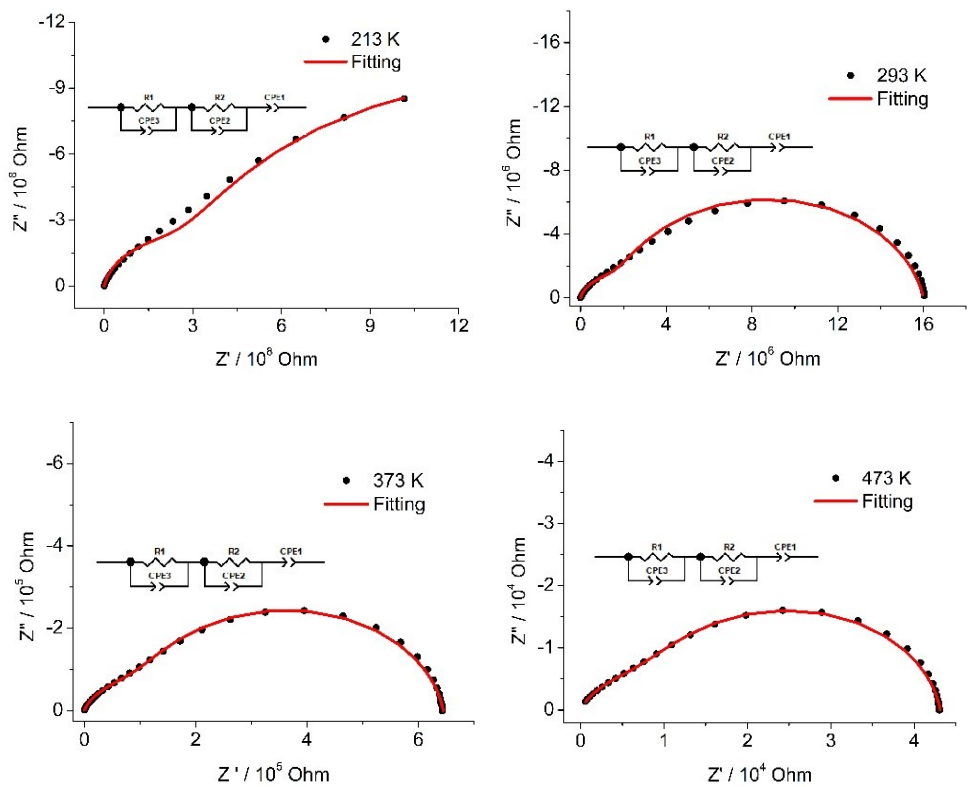

Fig. S7: Experimental and fitted impedance spectra of  $(\text{NH}_4)_2\text{V}_3\text{O}_8$  at the selected temperatures (Inset: the equivalent circuit).

Table S1: Selected bond lengths and bond valence sum (BVS) for calculation of V at 110, 190 and 300K

| T/K | Space group | V atom                                                                                         | V-O bond | Distance r /Å | bond-valence parameter $r_0$ | Valence state (s value) |
|-----|-------------|------------------------------------------------------------------------------------------------|----------|---------------|------------------------------|-------------------------|
| 110 | <i>P4bm</i> | V1                                                                                             | V1-O1    | 1.602(9)      | 1.784                        | 3.96                    |
|     |             |                                                                                                | V1-O2    | 1.985(4)      |                              |                         |
|     |             |                                                                                                | V1-O2#1  | 1.985(4)      |                              |                         |
|     |             |                                                                                                | V1-O2#2  | 1.985(4)      |                              |                         |
|     |             |                                                                                                | V1-O2#3  | 1.985(4)      |                              |                         |
|     |             | V2                                                                                             | V2-O4    | 1.637(6)      | 1.803                        | 5.23                    |
|     |             |                                                                                                | V2-O2    | 1.703(4)      |                              |                         |
|     |             |                                                                                                | V2-O2#4  | 1.703(4)      |                              |                         |
|     |             |                                                                                                | V2-O3    | 1.786(3)      |                              |                         |
|     |             | Symmetry codes: #1 = -1-x, 1+y, z; #2 = -x, -2-y, z; #3 = -1+x, -1-y, z; #4 = -0.5+x, 0.5+y, z |          |               |                              |                         |
| 190 | <i>P4bm</i> | V1                                                                                             | V1-O1    | 1.600(8)      | 1.784                        | 4.11                    |
|     |             |                                                                                                | V1-O2    | 1.962(4)      |                              |                         |
|     |             |                                                                                                | V1-O2#1  | 1.962(4)      |                              |                         |
|     |             |                                                                                                | V1-O2#2  | 1.962(4)      |                              |                         |
|     |             |                                                                                                | V1-O2#3  | 1.962(4)      |                              |                         |
|     |             | V2                                                                                             | V2-O4    | 1.641(5)      | 1.803                        | 5.18                    |
|     |             |                                                                                                | V2-O2    | 1.706(4)      |                              |                         |
|     |             |                                                                                                | V2-O2#4  | 1.706(4)      |                              |                         |
|     |             |                                                                                                | V2-O3    | 1.792(3)      |                              |                         |
|     |             | Symmetry codes: #1 = -x, -y, z; #2 = x, -y, z; #3 = -x, y, z; #4 = -x-0.5, -y-0.5, z           |          |               |                              |                         |
| 300 | <i>P4bm</i> | V1                                                                                             | V1-O1    | 1.599(9)      | 1.784                        | 4.11                    |
|     |             |                                                                                                | V1-O2    | 1.963(4)      |                              |                         |
|     |             |                                                                                                | V1-O2#1  | 1.963(4)      |                              |                         |
|     |             |                                                                                                | V1-O2#2  | 1.963(4)      |                              |                         |
|     |             |                                                                                                | V1-O2#3  | 1.963(4)      |                              |                         |
|     |             | V2                                                                                             | V2-O4    | 1.634(6)      | 1.803                        | 5.19                    |
|     |             |                                                                                                | V2-O2    | 1.707(4)      |                              |                         |
|     |             |                                                                                                | V2-O2#4  | 1.707(4)      |                              |                         |
|     |             |                                                                                                | V2-O3    | 1.796(3)      |                              |                         |
|     |             | Symmetry codes: #1 = -x+2, -y, z; #2 = x-1, -y+1, z; #3 = -x+1, y+1, z; #4 = x-0.5, y+0.5, z   |          |               |                              |                         |

The relationship between the bond length (r) and the bond valence (s) is described below,

$$s = \exp\left(\frac{r_0 - r}{B}\right)$$

where B is empirically determined parameter<sup>1</sup> with the value of 0.37.

Table S2: Crystallographic data and structural refinements for (NH<sub>4</sub>)<sub>2</sub>V<sub>3</sub>O<sub>8</sub> at the selected temperatures

| Temperature (K)                                                                                       | 110                                                         | 120                                                         | 130                                                         | 140                                                         |
|-------------------------------------------------------------------------------------------------------|-------------------------------------------------------------|-------------------------------------------------------------|-------------------------------------------------------------|-------------------------------------------------------------|
| Formula                                                                                               | H <sub>8</sub> N <sub>2</sub> O <sub>8</sub> V <sub>3</sub> | H <sub>8</sub> N <sub>2</sub> O <sub>8</sub> V <sub>3</sub> | H <sub>8</sub> N <sub>2</sub> O <sub>8</sub> V <sub>3</sub> | H <sub>8</sub> N <sub>2</sub> O <sub>8</sub> V <sub>3</sub> |
| Formula weight                                                                                        | 316.90                                                      | 316.90                                                      | 316.90                                                      | 316.90                                                      |
| CCDC                                                                                                  | 2004615                                                     | 2004673                                                     | 2005049                                                     | 2004617                                                     |
| Wavelength (Å)                                                                                        | 0.71073                                                     | 0.71073                                                     | 0.71073                                                     | 0.71073                                                     |
| Crystal system                                                                                        | tetragonal                                                  | tetragonal                                                  | tetragonal                                                  | tetragonal                                                  |
| Space group                                                                                           | <i>P4bm</i>                                                 | <i>P4bm</i>                                                 | <i>P4bm</i>                                                 | <i>P4bm</i>                                                 |
| <i>a</i> / Å                                                                                          | 8.8551(3)                                                   | 8.8572(3)                                                   | 8.8599(4)                                                   | 8.8620(4)                                                   |
| <i>b</i> / Å                                                                                          | 8.8551(3)                                                   | 8.8572(3)                                                   | 8.8599(4)                                                   | 8.8620(4)                                                   |
| <i>c</i> / Å                                                                                          | 5.5652(5)                                                   | 5.5653(5)                                                   | 5.5653(6)                                                   | 5.5652(6)                                                   |
| $\alpha$ / (°)                                                                                        | 90                                                          | 90                                                          | 90                                                          | 90                                                          |
| $\beta$ / (°)                                                                                         | 90                                                          | 90                                                          | 90                                                          | 90                                                          |
| $\gamma$ / (°)                                                                                        | 90                                                          | 90                                                          | 90                                                          | 90                                                          |
| <i>V</i> / Å <sup>3</sup>                                                                             | 436.38(5)                                                   | 436.60(5)                                                   | 436.86(6)                                                   | 437.06(6)                                                   |
| <i>Z</i>                                                                                              | 2                                                           | 2                                                           | 2                                                           | 2                                                           |
| <i>F</i> (000)                                                                                        | 310                                                         | 310                                                         | 310                                                         | 310                                                         |
| $\theta_{\min, \max}$ / °                                                                             | 3.254-27.575                                                | 3.253-27.574                                                | 3.252-27.574                                                | 3.251-27.574                                                |
| GOF                                                                                                   | 1.145                                                       | 1.182                                                       | 1.168                                                       | 1.165                                                       |
| <i>R</i> <sub>1</sub> <sup>a</sup> , <i>wR</i> <sub>2</sub> <sup>b</sup> [ <i>I</i> > 2σ( <i>I</i> )] | 0.0335, 0.0671                                              | 0.0335, 0.0680                                              | 0.0318, 0.0651                                              | 0.0311, 0.0635                                              |

<sup>a</sup>  $R_1 = \sum ||F_o| - |F_c| / \sum |F_o|$ . <sup>b</sup>  $wR_2 = \{ \sum [w(F_o^2 - F_c^2)^2] / \sum [w(F_o^2)^2] \}^{1/2}$

## Continue

|                                                                                                       | 160                                                         | 170                                                         | 190                                                         | 200                                                         |
|-------------------------------------------------------------------------------------------------------|-------------------------------------------------------------|-------------------------------------------------------------|-------------------------------------------------------------|-------------------------------------------------------------|
| Temperature (K)                                                                                       | 160                                                         | 170                                                         | 190                                                         | 200                                                         |
| Formula                                                                                               | H <sub>8</sub> N <sub>2</sub> O <sub>8</sub> V <sub>3</sub> | H <sub>8</sub> N <sub>2</sub> O <sub>8</sub> V <sub>3</sub> | H <sub>8</sub> N <sub>2</sub> O <sub>8</sub> V <sub>3</sub> | H <sub>8</sub> N <sub>2</sub> O <sub>8</sub> V <sub>3</sub> |
| Formula weight                                                                                        | 316.90                                                      | 316.90                                                      | 316.90                                                      | 316.90                                                      |
| CCDC                                                                                                  | 2004936                                                     | 2005050                                                     | 2004937                                                     | 2005052                                                     |
| Wavelength (Å)                                                                                        | 0.71073                                                     | 0.71073                                                     | 0.71073                                                     | 0.71073                                                     |
| Crystal system                                                                                        | tetragonal                                                  | tetragonal                                                  | tetragonal                                                  | tetragonal                                                  |
| Space group                                                                                           | <i>P4bm</i>                                                 | <i>P4bm</i>                                                 | <i>P4bm</i>                                                 | <i>P4bm</i>                                                 |
| <i>a</i> / Å                                                                                          | 8.8669(4)                                                   | 8.8700(4)                                                   | 8.8761(4)                                                   | 8.8776(4)                                                   |
| <i>b</i> / Å                                                                                          | 8.8669(4)                                                   | 8.8700(4)                                                   | 8.8761(4)                                                   | 8.8776(4)                                                   |
| <i>c</i> / Å                                                                                          | 5.5650(6)                                                   | 5.5649(6)                                                   | 5.5632(6)                                                   | 5.5610(6)                                                   |
| $\alpha$ / (°)                                                                                        | 90                                                          | 90                                                          | 90                                                          | 90                                                          |
| $\beta$ / (°)                                                                                         | 90                                                          | 90                                                          | 90                                                          | 90                                                          |
| $\gamma$ / (°)                                                                                        | 90                                                          | 90                                                          | 90                                                          | 90                                                          |
| <i>V</i> / Å <sup>3</sup>                                                                             | 437.53(6)                                                   | 437.83(6)                                                   | 438.30(6)                                                   | 438.27(6)                                                   |
| <i>Z</i>                                                                                              | 2                                                           | 2                                                           | 2                                                           | 2                                                           |
| <i>F</i> (000)                                                                                        | 310                                                         | 310                                                         | 310                                                         | 310                                                         |
| $\theta_{\min, \max}$ / °                                                                             | 3.249-27.574                                                | 3.248-27.573                                                | 3.246-27.581                                                | 3.245-27.591                                                |
| GOF                                                                                                   | 1.159                                                       | 1.168                                                       | 1.147                                                       | 1.143                                                       |
| <i>R</i> <sub>1</sub> <sup>a</sup> , <i>wR</i> <sub>2</sub> <sup>b</sup> [ <i>I</i> > 2σ( <i>I</i> )] | 0.0316, 0.0653                                              | 0.0316, 0.0652                                              | 0.0283, 0.0589                                              | 0.0288, 0.0604                                              |

$$^a R_1 = \sum ||F_o| - |F_c| / \sum |F_o|. \quad ^b wR_2 = \{ \sum [w(F_o^2 - F_c^2)^2] / \sum [w(F_o^2)^2] \}^{1/2}$$



## Continue

|                                                                                                       |                                                             |                                                             |                                                             |                                                             |
|-------------------------------------------------------------------------------------------------------|-------------------------------------------------------------|-------------------------------------------------------------|-------------------------------------------------------------|-------------------------------------------------------------|
| Temperature (K)                                                                                       | 220                                                         | 240                                                         | 270                                                         | 300                                                         |
| Formula                                                                                               | H <sub>8</sub> N <sub>2</sub> O <sub>8</sub> V <sub>3</sub> | H <sub>8</sub> N <sub>2</sub> O <sub>8</sub> V <sub>3</sub> | H <sub>8</sub> N <sub>2</sub> O <sub>8</sub> V <sub>3</sub> | H <sub>8</sub> N <sub>2</sub> O <sub>8</sub> V <sub>3</sub> |
| Formula weight                                                                                        | 316.90                                                      | 316.90                                                      | 316.90                                                      | 316.90                                                      |
| CCDC number                                                                                           | 2004952                                                     | 2005051                                                     | 2004953                                                     | 2004938                                                     |
| Wavelength (Å)                                                                                        | 0.71073                                                     | 0.71073                                                     | 0.71073                                                     | 0.71073                                                     |
| Crystal system                                                                                        | tetragonal                                                  | tetragonal                                                  | tetragonal                                                  | tetragonal                                                  |
| Space group                                                                                           | <i>P4bm</i>                                                 | <i>P4bm</i>                                                 | <i>P4bm</i>                                                 | <i>P4bm</i>                                                 |
| <i>a</i> / Å                                                                                          | 8.8868(3)                                                   | 8.8884(3)                                                   | 8.8891(3)                                                   | 8.8895(4)                                                   |
| <i>b</i> / Å                                                                                          | 8.8868(3)                                                   | 8.8884(3)                                                   | 8.8891(3)                                                   | 8.8895(4)                                                   |
| <i>c</i> / Å                                                                                          | 5.5606(5)                                                   | 5.5625(5)                                                   | 5.5691(5)                                                   | 5.5731(6)                                                   |
| $\alpha$ / (°)                                                                                        | 90                                                          | 90                                                          | 90                                                          | 90                                                          |
| $\beta$ / (°)                                                                                         | 90                                                          | 90                                                          | 90                                                          | 90                                                          |
| $\gamma$ / (°)                                                                                        | 90                                                          | 90                                                          | 90                                                          | 90                                                          |
| <i>V</i> / Å <sup>3</sup>                                                                             | 439.15(5)                                                   | 439.46(5)                                                   | 440.05(5)                                                   | 440.40(6)                                                   |
| <i>Z</i>                                                                                              | 2                                                           | 2                                                           | 2                                                           | 2                                                           |
| <i>F</i> (000)                                                                                        | 310                                                         | 310                                                         | 310                                                         | 310                                                         |
| $\theta_{\min, \max}$ / °                                                                             | 3.242-27.479                                                | 3.241-27.470                                                | 3.241-27.436                                                | 3.241-27.416                                                |
| GOF                                                                                                   | 1.110                                                       | 1.130                                                       | 1.104                                                       | 1.113                                                       |
| <i>R</i> <sub>1</sub> <sup>a</sup> , <i>wR</i> <sub>2</sub> <sup>b</sup> [ <i>I</i> > 2σ( <i>I</i> )] | 0.0269, 0.0547                                              | 0.0279, 0.0576                                              | 0.0325, 0.0680                                              | 0.0338, 0.0702                                              |

$$^a R_1 = \sum ||F_o| - |F_c|/\sum |F_o|. \quad ^b wR_2 = \{\sum [w(F_o^2 - F_c^2)^2]/\sum [w(F_o^2)^2]\}^{1/2}$$

## Continue

|                                                                                                       |                                                             |
|-------------------------------------------------------------------------------------------------------|-------------------------------------------------------------|
| Temperature (K)                                                                                       | 295 (In literature) <sup>2</sup>                            |
| Formula                                                                                               | H <sub>8</sub> N <sub>2</sub> O <sub>8</sub> V <sub>3</sub> |
| Formula weight                                                                                        | 316.90                                                      |
| CCDC number                                                                                           | 1997397                                                     |
| Wavelength (Å)                                                                                        | 0.71073                                                     |
| Crystal system                                                                                        | tetragonal                                                  |
| Space group                                                                                           | <i>P4bm</i>                                                 |
| <i>a</i> / Å                                                                                          | 8.9062 (4)                                                  |
| <i>b</i> / Å                                                                                          | 8.9062 (3)                                                  |
| <i>c</i> / Å                                                                                          | 5.5784(5)                                                   |
| $\alpha$ / (°)                                                                                        | 90                                                          |
| $\beta$ / (°)                                                                                         | 90                                                          |
| $\gamma$ / (°)                                                                                        | 90                                                          |
| <i>V</i> / Å <sup>3</sup>                                                                             | 442.48(5)                                                   |
| <i>Z</i>                                                                                              | 2                                                           |
| <i>F</i> (000)                                                                                        | 310                                                         |
| $\theta_{\min, \max}$ / °                                                                             | 2.552-27.488                                                |
| GOF                                                                                                   | 0.866                                                       |
| <i>R</i> <sub>1</sub> <sup>a</sup> , <i>wR</i> <sub>2</sub> <sup>b</sup> [ <i>I</i> > 2σ( <i>I</i> )] | 0.0163, 0.0296                                              |

$$^a R_1 = \sum ||F_o| - |F_c|/\sum |F_o|. \quad ^b wR_2 = \{\sum [w(F_o^2 - F_c^2)^2]/\sum [w(F_o^2)^2]\}^{1/2}$$

## References

1. I. D. Brown and D. Altermatt, *Acta Cryst.*, 1985, **B41**, 244–247.
2. A. Perez-Benitez and S. Bernes, *IUCrData*, 2020, **5**, x200488.
